# Supplementary material for: Comprehensive speciation of low-molecular weight selenium metabolites in mustard seeds using HPLC – electrospray linear trap/orbitrap tandem mass spectrometry
Source: Royal Society of Chemistry journal article supplement (doi:10.1039/c3mt00113j), 2013-01-01
Supplement: c3mt00113j.pdf [file c3mt00113j.pdf]

## Comprehensive speciation of low-molecular weight selenium metabolites in mustard seeds by HPLC - electrospray linear trap/Orbitrap tandem mass spectrometry

### Authors

Laurent Ouerdane<sup>a\*</sup>, Federica Aureli<sup>b</sup>, Paulina Flis<sup>a</sup>, Katarzyna Bierla<sup>a</sup>, Hugues Preud'homme<sup>a</sup>, Francesco Cubadda<sup>b</sup>, Joanna Szpunar<sup>a</sup>

<sup>a</sup> Laboratoire de Chimie Analytique Bio-Inorganique et Environnement, CNRS UMR 5254, Université de Pau et des Pays de l'Adour, 64053 Pau, France.

<sup>b</sup> Istituto Superiore di Sanità, Department of Food Safety and Veterinary Public Health, Rome, Italy

**Supplementary data**

**Table S1.** Low molecular weight Se species identified in *Brassica nigra* seeds. Compared to Table 2, additional data are presented such as HILIC and CE retention times (glucosinolates could not be detected by CE because only water extract was analyzed), MS/MS fragment ions (for novel molecules) and compound putative structures. Major Se species are presented in bold characters.

| n° | RT<br>HILIC | RT<br>CE | Exact<br>mass<br>(m/z) | Measured<br>mass<br>(m/z) | Error<br>value<br>(ppm) | Molecular<br>formula<br>(monocharged)                             | Ion.<br>mode | Fragment ions<br>(formula)                                                                                                                                                                                                                                                                                                                           | Fragment<br>ions<br>(rounded<br>mass)                             | Putative structure and name when applicable                                                                                 |
|----|-------------|----------|------------------------|---------------------------|-------------------------|-------------------------------------------------------------------|--------------|------------------------------------------------------------------------------------------------------------------------------------------------------------------------------------------------------------------------------------------------------------------------------------------------------------------------------------------------------|-------------------------------------------------------------------|-----------------------------------------------------------------------------------------------------------------------------|
| 1  | 1.9         | 19.8     | <b>105.92014</b>       | <b>105.92058</b>          | <b>4.2</b>              | <b>CNSe</b>                                                       | -            | /                                                                                                                                                                                                                                                                                                                                                    | /                                                                 | <b>(Iso)selenocyanate</b><br>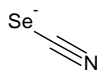            |
| 2  | 7.7         | /        | 507.98555              | 507.98612                 | 1.1                     | <b>C<sub>14</sub>H<sub>22</sub>NO<sub>10</sub>S<sub>2</sub>Se</b> | -            | HSO <sub>4</sub><br>C <sub>3</sub> H <sub>5</sub> O <sub>2</sub> Se<br>C <sub>6</sub> H <sub>9</sub> O <sub>8</sub> S<br>C <sub>9</sub> H <sub>15</sub> O <sub>10</sub> SSe                                                                                                                                                                          | 96.96<br>152.95<br>241.00<br>394.95                               | <b>Methylselenoacetylgluconapin</b><br> |
| 3  | 19.2        | /        | <b>467.99061</b>       | <b>467.98973</b>          | <b>-1.9</b>             | <b>C<sub>12</sub>H<sub>22</sub>NO<sub>9</sub>S<sub>2</sub>Se</b>  | -            | HSO <sub>4</sub><br>C <sub>6</sub> H <sub>11</sub> O <sub>5</sub> S<br>C <sub>6</sub> H <sub>12</sub> NOSSe<br>C <sub>6</sub> H <sub>11</sub> O <sub>9</sub> S<br>C <sub>6</sub> H <sub>11</sub> O <sub>8</sub> S <sub>2</sub><br>C <sub>6</sub> H <sub>12</sub> NO <sub>5</sub> SSe<br>C <sub>6</sub> H <sub>11</sub> O <sub>9</sub> S <sub>2</sub> | 96.96<br>195.03<br>225.98<br>259.01<br>274.99<br>289.96<br>290.98 | <b>Glucoselenoerucin</b><br>           |

|   |      |   |           |           |     |                      |   |                     |        |
|---|------|---|-----------|-----------|-----|----------------------|---|---------------------|--------|
| 4 | 20.2 | / | 404.13355 | 404.13367 | 0.3 | $C_{18}H_{30}NO_4Se$ | + | $C_9H_{11}O_2$      | 151.08 |
|   |      |   |           |           |     |                      |   | $C_{12}H_{20}NO_2$  | 210.15 |
|   |      |   |           |           |     |                      |   | $C_4H_{18}O_4$      | 250.12 |
|   |      |   |           |           |     |                      |   | $C_{17}H_{27}NO_4$  | 309.19 |
|   |      |   |           |           |     |                      |   | $C_{15}H_{21}O_4Se$ | 345.06 |

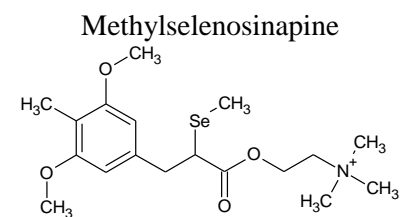

|   |      |   |           |           |      |                         |   |                    |        |
|---|------|---|-----------|-----------|------|-------------------------|---|--------------------|--------|
| 5 | 20.6 | / | 453.97496 | 453.97436 | -1.3 | $C_{11}H_{20}NO_9S_2Se$ | - | $HSO_4$            | 96.96  |
|   |      |   |           |           |      |                         |   | $C_6H_{11}O_5S$    | 195.03 |
|   |      |   |           |           |      |                         |   | $C_5H_{10}NOSse$   | 211.96 |
|   |      |   |           |           |      |                         |   | $C_6H_{11}O_9S$    | 259.01 |
|   |      |   |           |           |      |                         |   | $C_6H_{11}O_8S_2$  | 274.99 |
|   |      |   |           |           |      |                         |   | $C_5H_{10}NO_5Sse$ | 275.94 |
|   |      |   |           |           |      |                         |   | $C_6H_{11}O_9S_2$  | 290.98 |

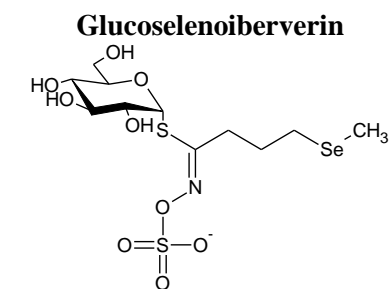

|   |      |    |           |           |      |                      |   |                  |        |
|---|------|----|-----------|-----------|------|----------------------|---|------------------|--------|
| 6 | 20.8 | ND | 268.08103 | 268.08101 | -0.1 | $C_{10}H_{20}NO_2Se$ | + | $C_5H_7O_2$      | 99.04  |
|   |      |    |           |           |      |                      |   | $C_6H_{10}O_2$   | 114.07 |
|   |      |    |           |           |      |                      |   | $C_8H_{16}NO_2$  | 158.12 |
|   |      |    |           |           |      |                      |   | $C_9H_{19}NO_2$  | 173.14 |
|   |      |    |           |           |      |                      |   | $C_7H_{13}O_2Se$ | 209.00 |

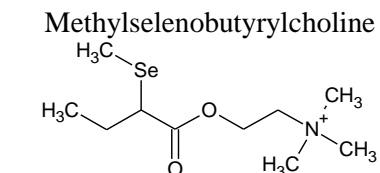

|   |      |      |           |           |     |                   |   |               |        |
|---|------|------|-----------|-----------|-----|-------------------|---|---------------|--------|
| 7 | 24.7 | 29.2 | 240.04973 | 240.04985 | 0.5 | $C_8H_{18}NO_2Se$ | + | $C_2H_5Se$    | 108.96 |
|   |      |      |           |           |     |                   |   | $C_3H_5OSe$   | 136.95 |
|   |      |      |           |           |     |                   |   | $C_5H_9O_2Se$ | 180.98 |

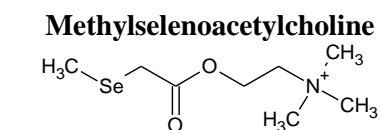

|           |      |      |                  |                  |             |                                                     |   |                                                                                                                                                               |                                      |                                                                                                                                    |
|-----------|------|------|------------------|------------------|-------------|-----------------------------------------------------|---|---------------------------------------------------------------------------------------------------------------------------------------------------------------|--------------------------------------|------------------------------------------------------------------------------------------------------------------------------------|
| <b>8</b>  | 30.7 | 22.5 | <b>180.98756</b> | <b>180.98754</b> | <b>-0.1</b> | <b>C<sub>4</sub>H<sub>9</sub>N<sub>2</sub>OSe</b>   | + | C <sub>3</sub> H <sub>5</sub> Se<br>C <sub>3</sub> H <sub>6</sub> NSe<br>C <sub>3</sub> H <sub>7</sub> OSe<br>C <sub>4</sub> H <sub>7</sub> N <sub>2</sub> Se | 120.96<br>135.97<br>138.97<br>162.98 | <b>Se-allyl-N-hydroxy-selenourea</b><br>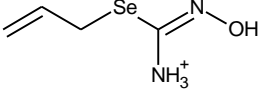        |
| <b>9</b>  | 32.8 | 13.6 | <b>198.00278</b> | <b>198.00286</b> | <b>0.4</b>  | <b>C<sub>5</sub>H<sub>12</sub>NO<sub>2</sub>Se</b>  | + | /                                                                                                                                                             | /                                    | <b>Selenomethionine (Table 1)</b><br>           |
| 9b        | 32.8 | 13.6 | 195.98713        | 195.98733        | 1.0         | C <sub>5</sub> H <sub>10</sub> NO <sub>2</sub> Se   | + | /                                                                                                                                                             | /                                    | <b>Oxidized selenomethionine</b><br>            |
| <b>10</b> | 34.7 | 5.5  | <b>408.07674</b> | <b>408.07698</b> | <b>0.6</b>  | <b>C<sub>12</sub>H<sub>26</sub>NO<sub>9</sub>Se</b> | + | /                                                                                                                                                             | /                                    | <b>Methylseleno-Se-deoxypentose-hexose</b><br> |
| <b>11</b> | 34.8 | 4.6  | <b>183.98713</b> | <b>183.98732</b> | <b>1.0</b>  | <b>C<sub>4</sub>H<sub>10</sub>NO<sub>2</sub>Se</b>  | + | /                                                                                                                                                             | /                                    | <b>Methylselenocysteine</b><br>               |

|    |      |      |           |           |     |                                                    |   |                                                    |        |
|----|------|------|-----------|-----------|-----|----------------------------------------------------|---|----------------------------------------------------|--------|
| 12 | 37.9 | 28.2 | 356.09714 | 356.09718 | 0.1 | C <sub>13</sub> H <sub>26</sub> NO <sub>5</sub> Se | + | C <sub>7</sub> H <sub>11</sub> O <sub>2</sub>      | 127.08 |
|    |      |      |           |           |     |                                                    |   | C <sub>3</sub> H <sub>7</sub> Se                   | 134.97 |
|    |      |      |           |           |     |                                                    |   | C <sub>3</sub> H <sub>5</sub> O <sub>2</sub> Se    | 152.95 |
|    |      |      |           |           |     |                                                    |   | C <sub>5</sub> H <sub>7</sub> O <sub>2</sub> Se    | 178.96 |
|    |      |      |           |           |     |                                                    |   | C <sub>7</sub> H <sub>11</sub> O <sub>2</sub> Se   | 206.99 |
|    |      |      |           |           |     |                                                    |   | C <sub>6</sub> H <sub>11</sub> O <sub>3</sub> Se   | 210.99 |
|    |      |      |           |           |     |                                                    |   | C <sub>7</sub> H <sub>13</sub> O <sub>3</sub> Se   | 225.00 |
|    |      |      |           |           |     |                                                    |   | C <sub>9</sub> H <sub>15</sub> O <sub>2</sub> Se   | 235.02 |
|    |      |      |           |           |     |                                                    |   | C <sub>10</sub> H <sub>22</sub> NO <sub>2</sub> Se | 268.08 |
|    |      |      |           |           |     |                                                    |   | C <sub>10</sub> H <sub>17</sub> O <sub>5</sub> Se  | 297.02 |

Selenized choline ester

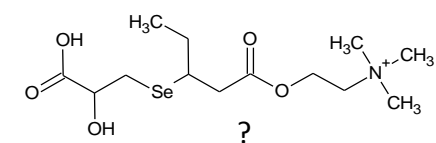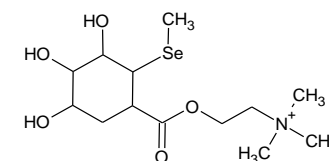

|                                                    |        |      |           |           |     |                                                                   |   |                                                    |        |
|----------------------------------------------------|--------|------|-----------|-----------|-----|-------------------------------------------------------------------|---|----------------------------------------------------|--------|
| 13                                                 | 39     | 28.3 | 567.14587 | 567.14587 | 0.0 | C <sub>22</sub> H <sub>35</sub> N <sub>2</sub> O <sub>10</sub> Se | + | C <sub>4</sub> H <sub>7</sub> O <sub>2</sub>       | 87.04  |
|                                                    |        |      |           |           |     |                                                                   |   | C <sub>6</sub> H <sub>11</sub> O <sub>3</sub>      | 167.07 |
|                                                    |        |      |           |           |     |                                                                   |   | C <sub>6</sub> H <sub>10</sub> NO <sub>5</sub>     | 176.06 |
|                                                    |        |      |           |           |     |                                                                   |   | C <sub>11</sub> H <sub>11</sub> O <sub>4</sub>     | 207.07 |
|                                                    |        |      |           |           |     |                                                                   |   | C <sub>6</sub> H <sub>10</sub> NO <sub>4</sub> Se  | 239.98 |
|                                                    |        |      |           |           |     |                                                                   |   | C <sub>9</sub> H <sub>11</sub> O <sub>3</sub> Se   | 246.99 |
|                                                    |        |      |           |           |     |                                                                   |   | C <sub>13</sub> H <sub>15</sub> O <sub>5</sub>     | 251.09 |
|                                                    |        |      |           |           |     |                                                                   |   | C <sub>6</sub> H <sub>10</sub> NO <sub>5</sub> Se  | 255.97 |
|                                                    |        |      |           |           |     |                                                                   |   | C <sub>16</sub> H <sub>25</sub> NO <sub>5</sub>    | 311.17 |
|                                                    |        |      |           |           |     |                                                                   |   | C <sub>12</sub> H <sub>16</sub> NO <sub>5</sub> Se | 334.02 |
| C <sub>16</sub> H <sub>26</sub> NO <sub>5</sub> Se | 392.10 |      |           |           |     |                                                                   |   |                                                    |        |
| C <sub>15</sub> H <sub>20</sub> NO <sub>8</sub> Se | 422.03 |      |           |           |     |                                                                   |   |                                                    |        |

N-2,3-dihydroxypropionyl-selenocysteine conjugated to sinapine

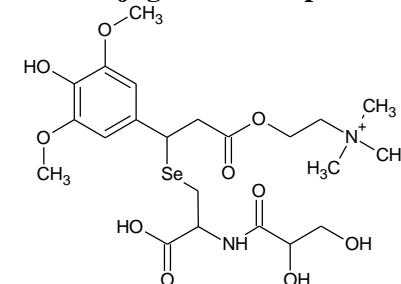

|    |      |     |           |           |      |                                                                 |   |   |   |
|----|------|-----|-----------|-----------|------|-----------------------------------------------------------------|---|---|---|
| 14 | 40.6 | 8.5 | 313.02976 | 313.02953 | -0.7 | C <sub>9</sub> H <sub>17</sub> N <sub>2</sub> O <sub>5</sub> Se | + | / | / |
|----|------|-----|-----------|-----------|------|-----------------------------------------------------------------|---|---|---|

γ-glutamyl-Se-methylselenocysteine

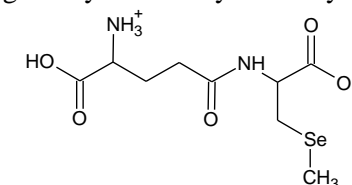

|                   |        |      |           |           |      |                        |   |                   |        |
|-------------------|--------|------|-----------|-----------|------|------------------------|---|-------------------|--------|
| 15                | 41.2   | 16.5 | 343.04029 | 343.04023 | -0.2 | $C_{10}H_{19}N_2O_6Se$ | + | $C_4H_5O_2$       | 85.03  |
|                   |        |      |           |           |      |                        |   | $C_5H_5O_2$       | 97.03  |
|                   |        |      |           |           |      |                        |   | $C_3H_5Se$        | 120.96 |
|                   |        |      |           |           |      |                        |   | $C_6H_7O_3$       | 127.04 |
|                   |        |      |           |           |      |                        |   | $C_3H_6NSe$       | 135.97 |
|                   |        |      |           |           |      |                        |   | $C_3H_7OSe$       | 138.97 |
|                   |        |      |           |           |      |                        |   | $C_6H_9O_9$       | 145.05 |
|                   |        |      |           |           |      |                        |   | $C_4H_7N_2Se$     | 162.98 |
|                   |        |      |           |           |      |                        |   | $C_4H_9N_2OSe$    | 180.99 |
|                   |        |      |           |           |      |                        |   | 16                | 41.3   |
| $C_4H_5O_2$       | 85.03  |      |           |           |      |                        |   |                   |        |
| $C_4H_8NO_2$      | 102.05 |      |           |           |      |                        |   |                   |        |
| $C_3H_5Se$        | 120.96 |      |           |           |      |                        |   |                   |        |
| $C_4H_5OSe$       | 148.95 |      |           |           |      |                        |   |                   |        |
| $C_4H_7O_2Se$     | 166.96 |      |           |           |      |                        |   |                   |        |
| $C_4H_{10}NO_2Se$ | 183.99 |      |           |           |      |                        |   |                   |        |
| $C_6H_{12}NOSe$   | 194.01 |      |           |           |      |                        |   |                   |        |
| $C_7H_{14}NO_3Se$ | 240.01 |      |           |           |      |                        |   |                   |        |
| 17                | 41.4   | ND   | 346.00362 | 346.00374 | 0.3  | $C_9H_{16}NO_8Se$      | + | $C_3H_8NO_3$      | 106.04 |
|                   |        |      |           |           |      |                        |   | $C_3H_5O_3Se$     | 168.94 |
|                   |        |      |           |           |      |                        |   | $C_6H_{10}NO_5$   | 176.06 |
|                   |        |      |           |           |      |                        |   | $C_5H_7O_3Se$     | 194.96 |
|                   |        |      |           |           |      |                        |   | $C_5H_{10}NO_3Se$ | 211.98 |
|                   |        |      |           |           |      |                        |   | $C_6H_9O_5Se$     | 240.96 |
|                   |        |      |           |           |      |                        |   | $C_6H_{10}NO_5Se$ | 255.97 |

**Se-glucosyl-Se-allyl-N-hydroxy-selenourea**

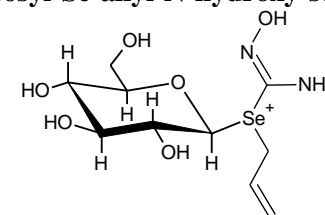

**Hydroxy-deamino-selenohomolanthionine**

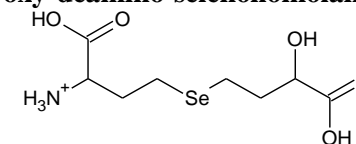

**2-hydroxy-3-selenylpropanoic acid-N-2,3-dihydro-propionyl-selenocysteine**

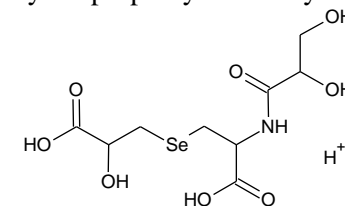

18 43.9 2.9 345.01969 345.01929 -1.2 C<sub>9</sub>H<sub>17</sub>N<sub>2</sub>O<sub>7</sub>Se + / / N-2,3-dihydroxypropionyl-selenolanthionine

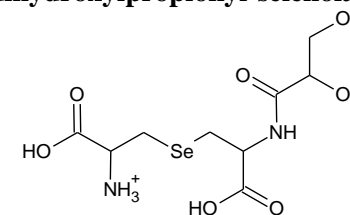

19 45.1 2.3 304.02939 304.02917 -0.7 C<sub>8</sub>H<sub>18</sub>NO<sub>6</sub>Se + C<sub>2</sub>H<sub>5</sub>Se 108.96  
 C<sub>4</sub>H<sub>5</sub>Se 132.95  
 C<sub>3</sub>H<sub>5</sub>OSe 136.95  
 C<sub>5</sub>H<sub>5</sub>OSe 160.95  
 C<sub>5</sub>H<sub>7</sub>O<sub>2</sub>Se 178.96  
 C<sub>5</sub>H<sub>9</sub>O<sub>3</sub>Se 196.97  
 C<sub>5</sub>H<sub>11</sub>O<sub>4</sub>Se 214.98  
 5'-3-selenylpropanoic acid-ribofuranose ?  
 NH<sub>4</sub><sup>+</sup>

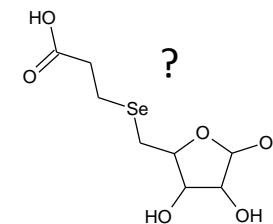

20 ND 29 144.90455 144.90452 -0.2 HSeO<sub>4</sub> - / /

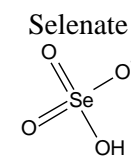

21 ND 21 198.98679 198.98686 0.4  $C_5H_{11}O_3Se$  +  $C_4H_7O_2$  87.04

Methylseleno carbohydrate

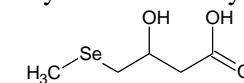

$H^+$

or

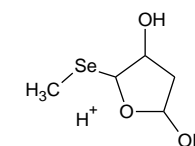

22 ND 21.3 213.00244 213.00238 -0.3  $C_6H_{13}O_3Se$  +  $C_4H_7O_2$  87.04  
 $C_5H_9O_2$  101.06

Methylseleno carbohydrate

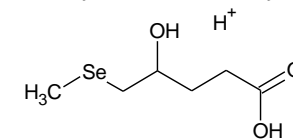

or

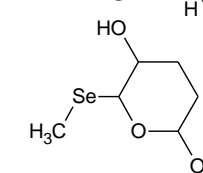

23 ND 1.7 407.04546 407.04474 -1.8  $C_{12}H_{23}O_{10}Se$  + / /

Methylseleno-Se-pentose-hexose

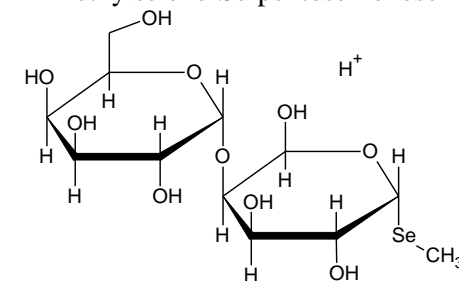



24 7.8 / 674.04795 674.04864 -1.0 C<sub>23</sub>H<sub>32</sub>NO<sub>13</sub>S<sub>2</sub>Se - /<sup>d</sup> /<sup>d</sup>

Methylselenosinapoylgluconapin

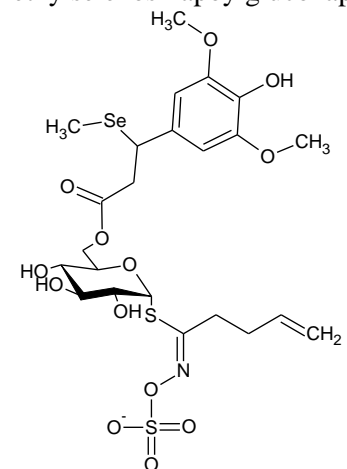

25 9.3 / 660.03303 660.03298 0.1 C<sub>22</sub>H<sub>30</sub>NO<sub>13</sub>S<sub>2</sub>Se - /<sup>d</sup> /<sup>d</sup>

Methylselenosinapoylsinigrin

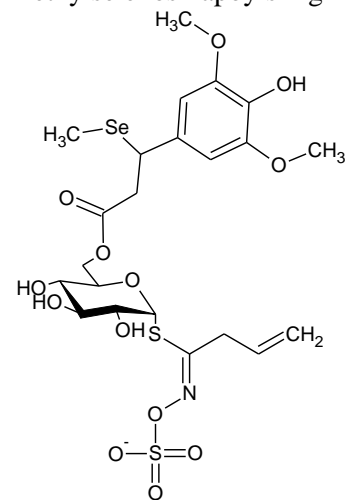



|                   |      |   |             |           |     |                              |                        |                |                |                                                                       |
|-------------------|------|---|-------------|-----------|-----|------------------------------|------------------------|----------------|----------------|-----------------------------------------------------------------------|
| 28                | 13.5 | / | 573.01304   | 573.01213 | 1.6 | $C_{18}H_{25}N_2O_{10}S_2Se$ | -                      | / <sup>d</sup> | / <sup>d</sup> | Methylselenoneoglucobrassicin or methylseleno-4-methoxyglucobrassicin |
|                   |      |   |             |           |     |                              |                        |                |                |                                                                       |
| 29 <sup>a,b</sup> | /    | / | RT matching | /         | /   | $C_2H_6Se_2$                 | /                      | /              | /              | Dimethyldiselenide<br>$H_3C-Se-Se-CH_3$                               |
| 30 <sup>b,c</sup> | /    | / | /           | 163       | /   | $C_5H_9NSe$                  | +<br>(M <sup>+</sup> ) | $C_2H_5Se$     | 109/107        | 4-(methylseleno)butanenitrile<br>                                     |
| 31 <sup>b,c</sup> | /    | / | /           | 177       | /   | $C_6H_{11}NSe$               | +<br>(M <sup>+</sup> ) | $C_2H_5Se$     | 109/107        | 5-(methylseleno)pentanenitrile<br>                                    |
| 32 <sup>b,c</sup> | /    | / | /           | 195       | /   | $C_5H_9N_2S_2Se$             | +<br>(M <sup>+</sup> ) | $C_2H_2NS$     | 72             | 3-(methylseleno)propylisothiocyanate<br>                              |

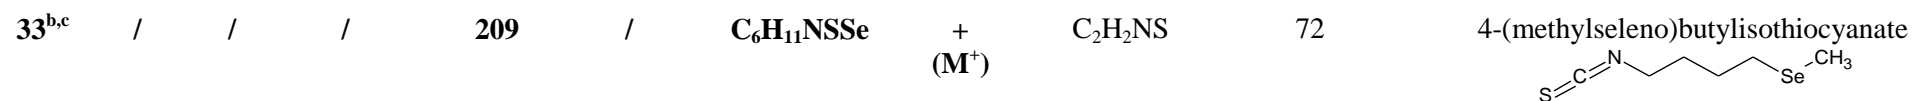

<sup>a</sup> Dimethyldiselenide was identified by retention time matching with the corresponding standard. <sup>b</sup> Compounds **29** to **33** were observed by GC ICP MS and GC APCI TQ MS coupling (low resolution) <sup>c</sup> Compounds **30** to **33** were identified through their specific mass transitions. <sup>d</sup> These Se glucosinolates are present at trace levels and their identification was done according to the determine structure of the closely eluting abundant analogue forms lacking the methylselenol group. Methylselenol group was predicted to react with the available oxidative-sensitive double bond present in these species.
